# Supplementary material for: Impact of COVID-19 on Physical Activity in Families Managing ADHD and the Cyclical Effect on Worsening Mental Health
Source: MDPI journal article supplement (doi:10.3390/brainsci13060887), 2023-05-31
Supplement: s1 [file s1]

## **S1 Appendix – Parent Interview Guide**

**Interviewer:** *Today, I am going to ask you how the COVID-19 pandemic has impacted your child and family.*

**Part 1 – Interviewer:** *When thinking of your child(ren) with ADHD...*

- 1) Have there been unique barriers for your child during the COVID-19 pandemic because of their ADHD diagnosis?
- 2) Have you noticed any changes in the presenting characteristics or symptoms associated with your child's ADHD?

**Part 2 – Interviewer:** *The next few questions aim to understand how the COVID-19 pandemic has impacted your child's and your physical activity participation.*

- 1) What was your child's daily/weekly amount of physical activity prior to the COVID-19 pandemic? (including school, extra-curricular activities)
  - a. What kinds of activities were they doing?
- 2) What as your daily/weekly amount of physical activity prior to the COVID-19 pandemic?
  - a. What kinds of activities were you doing?
- 3) Since the pandemic began, have you been able to incorporate physical activity into your child's/your own daily routine?
  - a. If yes, how? If not, why not?
- 4) What is the biggest barrier to incorporating physical activity into your and your child(ren)'s routine during the COVID-19 pandemic?
- 5) What supports would you need to better incorporate physical activity during a pandemic?
